# Supplementary material
Source: HighWire-hosted journal article supplement (https://jpet.aspetjournals.org/highwire/filestream/141852/field_highwire_adjunct_files/0/246686SupplData.pdf)
Supplement: 246686SupplData.pdf [file 246686SupplData.pdf]

## Supplemental Data

### Protectin DX ameliorates hepatic steatosis by suppression of endoplasmic reticulum stress *via* AMPK-induced ORP150 expression

Tae Woo Jung, Eun Jung Kyung, Hyoung-Chun Kim, Yong Kyu Shin, Sung Hoon Lee, Eon

Sub Park, Ahmet Hacımüftüoğlu, A.M. Abd El-Aty, Ji Hoon Jeong

Journal of Pharmacology and Experimental Therapeutics

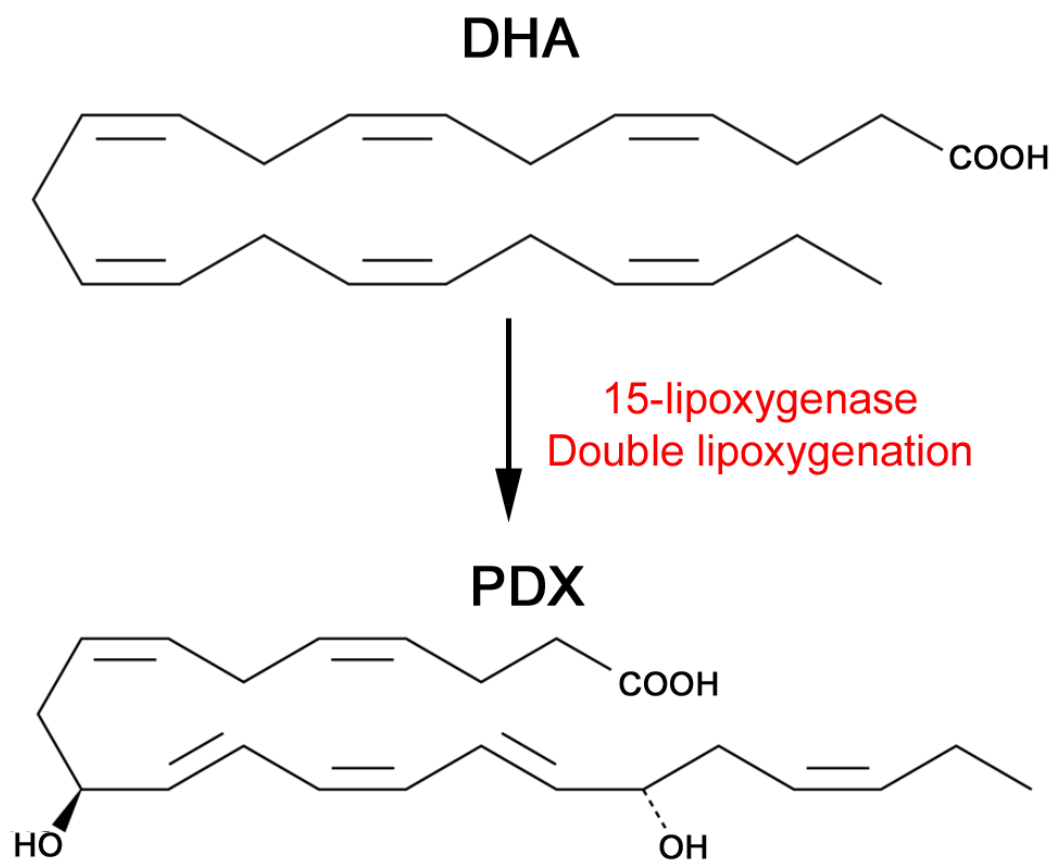

**Suppl. Fig. 1.** PDX is produced through double lipoxygenation of DHA.

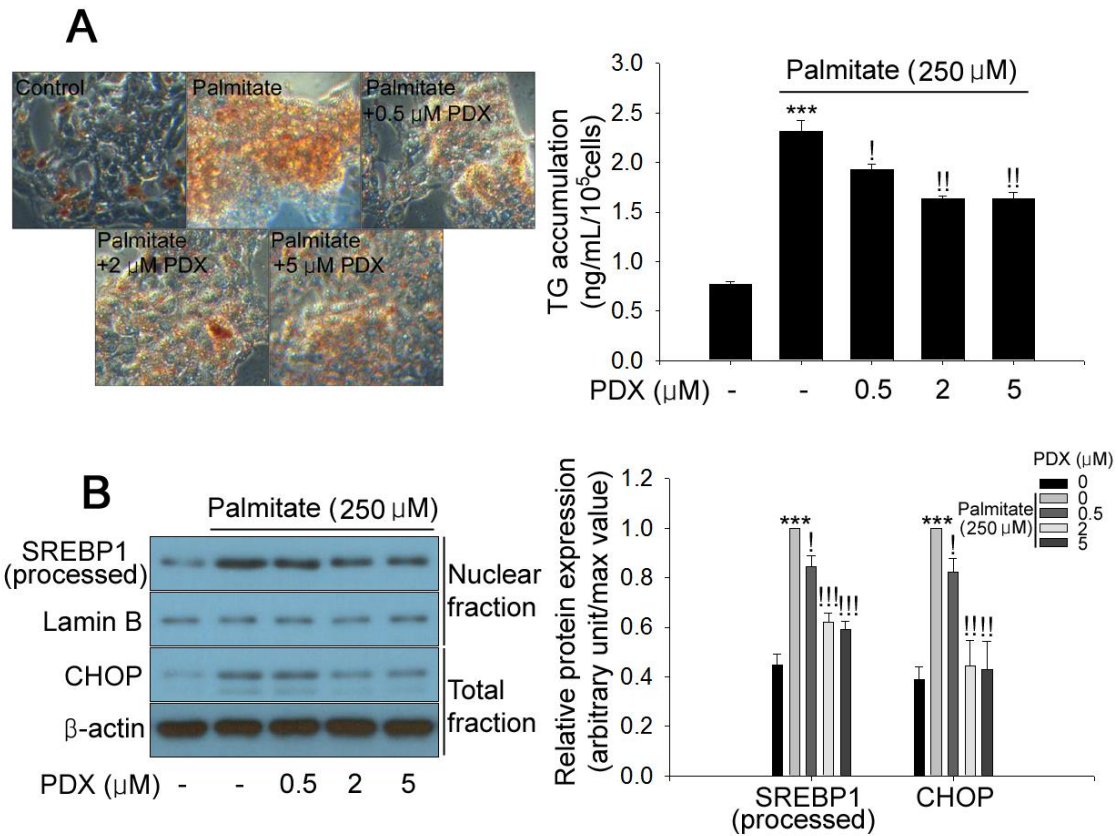

**Suppl. Fig. 2.** PDX suppresses palmitate-induced lipid accumulation and ER stress in HepG2 cells. (A) Oil-red O staining in HepG2 cells in the presence of 250 μM palmitate and PDX (0-5 μM) for 24 h. TG accumulation was quantitated by modified TG assay kit. (B) Western blot analysis of SREBP1 (processed) expression in nuclear fraction and CHOP expression in total fraction of HepG2 cells in the presence of 250 μM palmitate and PDX (0-5 μM) for 24 h. Means ± SEM were calculated from three independent experiments. One-way ANOVA with Tukey post-hoc was performed. <sup>\*\*\*</sup>*P*<0.001 when compared to levels in control. <sup>!!!</sup>*P*<0.001, <sup>!!</sup>*P*<0.01, and <sup>!</sup>*P*<0.05 when compared to palmitate treatment.
